# Supplementary material
Source: publisher figshare collection journal article supplement (https://tandf.figshare.com/ndownloader/files/22515344)
Supplement: Supplementary file 1 [file 22515344]

Regioselective synthesis of unsymmetrical 3-(quinolin-3-yl)pentane-1,5-diones in the aqueous medium through Montmorillonite KSF catalysis

Eethamukkala Ubba and Fazlur-Rahman Nawaz Khana*

aOrganic and Medicinal Chemistry Research Laboratory, Department of Chemistry, School of Advanced Sciences, Vellore Institute of Technology, Vellore-632 014, Tamil Nadu, India.

*Correspondence: E-mail; Prof. F. Nawaz Khan: [nawaz_f@yahoo.co.in](mailto:nawaz_f@yahoo.co.in)

**General methods: C**hemicals required were purchased from Sigma-Aldrich chemicals, used without purification. TLC was monitored by using Pre-coated aluminium TLC sheets (silica gel 60F254, Merck). FTIR spectra were recorded by using Shimadzu IR Tracer-100. NMR spectra were recorded using Bruker AVANCE-III(400 MHz) in CDCl3, Chemicals shift were given in parts per million (ppm, δ), referenced to the solvent peak of CDCl3, defined at δ = 7.26 ppm (1H NMR) and δ= 77.16 (13C NMR).

**1. General method for the synthesis of unsymmetrical 1,5-diones, 3**

The 2-chloro-3-formylquinolines, **1a** (1 mmol), acetophenone, **2a** (1.2 mmol), was taken in a 20 mL closed vial along with M-KSF catalyst (50 mg) and 5 mL water mixture, kept stirring reflux temperatures in the parallel synthesizer then substituted acetophenones **2b** (1 mmol) were added and continued the reaction tiller the completion of the reaction as monitored by TLC. The reaction mixture was filtered, the crude product, **3a** was dissolved using dichloromethane, filtered again to remove the M-KSF, then evaporated and purified by flash column chromatography of ethyl acetate and pet ether (10% v/v). The pure product was characterized by proton and carbon NMR, HRMS, and FT-IR spectral techniques.

**2. Spectral Information of the synthesized products: 3a-l**

**1-(4-chlorophenyl)-3-(2-chloroquinolin-3-yl)-5-phenylpentane-1,5-dione (3a):** White solid, Yield (81%), mp 142-145 oC, IR (KBr, cm-1) 1678.07 (*4*-ClC6H4-C=O), 1641.42 (C6H5-C=O). 1H NMR (400 MHz, CDCl3) δ 8.16 (s, 1H), 7.97 (dd, *J* = 17.0, 7.44 Hz, 4H), 7.91 (d, *J* = 8. 1 Hz, 1H), 7.76 (d, *J* = 8 Hz, 1H), 7.67 (t, *J* = 8 Hz, 1H), 7.51-7.57 (m, 2H), 7.40-7.46 (m, 4H), 4.61 (pt, 1H), 3.57-3.72 (m, 4H); 13C NMR (100 MHz, CDCl3) δ 197.9, 196.8, 150.7, 150.6, 146.4, 139.8, 137.1, 136.6, 135.0, 134.7, 133.4, 130.2, 130.1, 129.5, 129.0, 128.7, 128.1, 127.3, 127.1, 42.5, 42.4, 33.9 ppm. HRMS [EI+]calcd for C26H19Cl2NO2 m/z 447.0793 [M+], found 447.0787 [M+].

**3-(2-chloroquinolin-3-yl)-1-(4-fluorophenyl)-5-phenylpentane-1,5-dione (3b):** White solid, Yield (85%), mp 150-152oC, IR (KBr, cm-1) 1678.02 (*4*-F C6H4-C=O), 1638.27 (C6H5-C=O). 1H NMR (400 MHz, CDCl3) δ 8.17 (s, 1H), 8.00 (dd, *J* = 17.0, 7.8 Hz, 5H), 7.77 (d, *J* = 7.9 Hz, 1H), 7.67 (d, *J* = 7.1 Hz, 1H), 7.55 (dd, *J* = 13.8, 7.2 Hz, 2H), 7.45 (t, *J* = 7.3 Hz, 2H), 7.12 (t, *J* = 8.2 Hz, 2H), 4.61 (dt, *J* = 13.1, 6.5 Hz, 1H), 3.63 (pd, *J* = 17.3, 6.9 Hz, 4H); 13C NMR (100 MHz, CDCl3) δ 197.9, 196.4, 167.1, 164.6, 150.6, 146.4, 137.1, 136.6, 134.8, 133.4, 133.0, 130.7, 130.1, 128.7, 128.1, 127.3, 127.1, 115.9, 115.7, 42.4, 42.3, 33.9 ppm. HRMS [EI+]calcd for C26H19ClFNO2 m/z 431.1088 [M+], found 431.1080 [M+].

**1-(4-chlorophenyl)-3-(2-chloroquinolin-3-yl)-5-(4-fluorophenyl)pentane-1,5-dione** (3c): White solid, Yield (80%), mp 252-255 oC, IR (KBr, cm-1) 1679.60 (*4*-ClC6H4-C=O), 1668.78 (*4*-FC6H4-C=O). 1H NMR (400 MHz, CDCl3) δ 8.16 (d, *J* = 2.0 Hz, 1H), 8.04 – 7.87 (m, 5H), 7.78 (d, *J* = 8.1 Hz, 1H), 7.69 (t, *J* = 7.3 Hz, 1H), 7.54 (t, *J* = 7.4 Hz, 1H), 7.43 (d, *J* = 8.6 Hz, 2H), 7.13 (t, *J* = 8.6 Hz, 2H), 4.64 – 4.53 (m, 1H), 3.71 – 3.52 (m, 4H); 13C NMR (100 MHz, CDCl3) δ 196.7, 196.3,167.2, 164.6, 150.5, 146.4, 139.9, 137.1, 134.8, 134.6, 130.8, 130.2, 129.5, 129.0, 128.1, 127.3, 127.2, 115.9, 115.7, 42.4, 42.2, 33.9 ppm. HRMS [EI+]calcd for C26H18Cl2FNO2 m/z 465.0699 [M+], found 465.0698 [M+].

**3-(2-chloro-7-methylquinolin-3-yl)-1-(4-methoxyphenyl)-5-phenylpentane-1,5-dione (3d):** White solid, Yield (79%), mp 290-293 oC, IR (KBr, cm-1) 1682 (*4*-OCH3C6H4-C=O), 1658 (C6H5-C=O). 1H NMR (400 MHz, CDCl3) δ 8.04 (s, 1H), 7.90 (dd, *J* = 8.1, 4.0 Hz, 4H), 7.67 (s, 1H), 7.58 (d, *J* = 8.3 Hz, 1H), 7.48 (t, *J* = 7.2 Hz, 1H), 7.38 (t, *J* = 7.6 Hz, 3H), 7.28 (d, *J* = 8.2 Hz, 1H), 6.84 (d, *J* = 8.6 Hz, 1H), 4.52 (dd, *J* = 13.3, 6.7 Hz, 1H), 3.78 (s, 2H), 3.65 – 3.45 (m, 4H), 2.46 (s, 3H). 13C NMR (101 MHz, CDCl3) δ 198.0, 146.7, 140.6, 136.6, 133.3, 130.4, 129.3, 128.7, 128.1, 127.1, 127.0, 125.3, 113.8, 55.5, 42.5, 21.9ppm. HRMS [EI+]calcd for C28H24ClNO3 m/z 457.1445 [M+], found (Same as 3i) [M+].

**3-(2-chloro-7-methylquinolin-3-yl)-1-(4-fluorophenyl)-5-phenylpentane-1,5-dione (3e):** White solid, Yield (78%), mp 140-143 oC, IR (KBr, cm-1) 1668.43(*4*-FC6H4-C=O), 1628.78 (C6H5-C=O). 1H NMR (400 MHz, CDCl3) δ 8.11 (s, 1H), 8.05 – 7.95 (m, 4H), 7.74 (s, 1H), 7.65 (d, *J* = 8.3 Hz, 1H), 7.58 – 7.51 (m, 1H), 7.45 (t, *J* = 7.6 Hz, 2H), 7.35 (dd, *J* = 8.3, 1.6 Hz, 1H), 7.16 – 7.08 (m, 2H), 4.58 (dt, *J* = 13.3, 6.7 Hz, 1H), 3.72 – 3.50 (m, 4H), 2.53 (s, 3H). 13C NMR (101 MHz, CDCl3) δ 198.0, 198.0, 196.5, 196.4, 167.1, 164.6, 150.5, 146.7, 140.7, 140.6, 136.8, 136.6, 136.6, 133.9, 133.7, 133.4, 133.3, 133.0, 130.8, 130.7, 129.4, 129.4, 129.3, 128.7, 128.7, 128.1, 128.1, 127.1, 126.9, 125.3, 115.9, 115.9, 115.7, 115.7, 42.5, 42.5, 42.4, 33.9, 21.9ppm., DEPT-135; δ 42.56, 42.43(-CH2- down peaks). HRMS [EI+] calcd for C27H21ClFNO2 m/z 445.1245 [M+], found 445.1240 [M+].

**3-(2-chloro-6-methylquinolin-3-yl)-1-(4-fluorophenyl)-5-phenylpentane-1,5-dione (3f):** White solid, Yield (85%), mp 133-135 oC, IR (KBr, cm-1) 1678.07 (*4*-FC6H4-C=O), 1628.43 (C6H5-C=O). 1H NMR (400 MHz, CDCl3) δ 8.07 (s, 1H), 8.04 – 7.94 (m, 4H), 7.86 (d, *J* = 8.6 Hz, 1H), 7.60 – 7.41 (m, 5H), 7.12 (t, *J* = 8.5 Hz, 2H), 4.58 (dt, *J* = 13.3, 6.6 Hz, 1H), 3.72 – 3.51 (m, 4H), 2.50 (s, 3H). 13C NMR (100 MHz, CDCl3) δ 198.0, 198.0, 196.4, 196.4, 145.0, 137.1, 136.5, 134.6, 133.4, 133.3, 133.0, 132.4, 130.8, 130.7, 128.7, 128.7, 128.1, 127.7, 127.2, 126.2, 115.9, 115.7, 42.5, 42.4, 42.3, 34.0, 21.6 ppm. HRMS [EI+] calcd for C27H21ClFNO2 m/z 445.1245 [M+], found 445.1245(same as 3e) [M+].

**3-(2-chloro-6-methylquinolin-3-yl)-1-(4-chlorophenyl)-5-(4-fluorophenyl)pentane-1,5-dione (3g):** White solid, Yield (81%), mp 146-148 oC, IR (KBr, cm-1) 1685.79 (*4*-ClC6H4-C=O), 1678.07 (*4*-FC6H4-C=O). 1H NMR (400 MHz, CDCl3) δ 8.01 (s, 1H), 7.89 (m, 2H), 7.83 (d, *J* = 8.1 Hz, 2H), 7.78 (d, *J* = 8.5 Hz, 1H), 7.43 (d, *J* = 9.9 Hz, 2H), 7.34 (d, *J* = 8.5 Hz, 2H), 7.04 (t, *J* = 8.5 Hz, 2H), 4.53 – 4.43 (m, 1H), 3.52 (qd, *J* = 17.2, 6.7 Hz, 4H), 2.42 (s, 3H). 13C NMR (100 MHz, CDCl3) δ 195.7, 195.7, 195.3, 195.3, 166.1, 163.6, 148.5, 144.0, 138.8, 136.2, 135.5, 133.8, 133.3, 133.3, 131.9, 131.4, 129.8, 129.7, 128.5, 128.0, 126.7, 126.2, 125.1, 114.9, 114.6, 41.3, 41.3, 32.9, 20.5 ppm. HRMS [EI+] calcd for C27H20Cl2FNO2 m/z 479.0855 [M+], found 479.0850 [M+].

**3-(2-chloro-6-methylquinolin-3-yl)-1-(4-fluorophenyl)-5-(4-methoxyphenyl)pentane-1,5-dione (3h):**White solid, Yield (78%), mp 138-140 oC, IR (KBr, cm-1) 1687.71 (*4*-OCH3C6H4-C=O), 1676.14 (*4*-FC6H4-C=O). 1H NMR (400 MHz, CDCl3) δ 8.04 (s, 1H), 7.83 (m, 4H), 7.78 (d, *J* = 8.1 Hz, 1H), 7.43 (d, *J* = 10.5 Hz, 2H), 7.04 (t, *J* = 8.0 Hz, 3H), 6.84 (d, *J* = 7.9 Hz, 1H), 4.55 – 4.42 (m, 1H), 3.78 (s, 3H), 3.63 – 3.39 (m, 4H), 2.42 (s, 3H). 13C NMR (101 MHz, CDCl3) δ 196.5, 196.4, 167.1, 164.6, 163.7, 149.7, 149.6, 145.0, 145.0, 137.2, 137.1, 136.4, 134.7, 134.4, 133.0, 133.0, 132.5, 132.4, 130.8, 130.7, 130.6, 130.4, 129.7, 127.8, 127.2, 126.2, 115.9, 115.9, 115.7, 115.6, 113.8, 113.7, 55.5, 42.4, 42.4, 42.2, 34.1, 34.0, 21.5 ppm. HRMS [EI+] calcd for C28H23ClFNO3 m/z 475.135 [M+], found 475.1340 [M+].

**3-(2-chloro-6-methylquinolin-3-yl)-1-(4-methoxyphenyl)-5-phenylpentane-1,5-dione (3i):** White solid, Yield (88%), mp 118-120 oC, IR (KBr, cm-1) 1672.28 (*4*-OCH3C6H4-C=O), 1629.85 (C6H5-C=O). 1H NMR (400 MHz, CDCl3) δ 8.00 (s, 1H), 7.88-7.90 (m, 4H), 7.77-7.79 (d, *J* = 8.85 Hz, 1H), 7.35-7.47 (m, 6H), 6.83-6.85 (d, *J* = 8.30 Hz, 1H), 4.49-4.52 (pt, 1H), 3.77 (s, 3H), 3.47-3.60 (m, 4H), 2.41 (s, 3H); 13C NMR (100 MHz, CDCl3) δ 196.98, 195.51, 162.64, 148.80, 143.97, 136.01, 135.60, 133.88, 133.76, 132.32, 131.28, 129.43, 128.72, 127.66, 127.10, 126.73, 126.28, 125.22, 112.79, 54.46, 41.46, 41.20, 33.14, 20.54 ppm. HRMS [EI+]calcd for C28H24ClNO3 m/z 457.1445 [M+], found 457.1442 [M+].

**3-(2-chloro-5,7-dimethylquinolin-3-yl)-1-(4-fluorophenyl)-5-phenylpentane-1,5-dione (3j):** White solid, Yield (82%), mp 145-148oC, IR (KBr, cm-1) 1691.57 (*4*-FC6H4-C=O), 1620.21 (C6H5-C=O) 1H NMR (400 MHz, CDCl3) δ 8.22 (s, 1H), 7.97 (d, *J* = 7.3 Hz, 1H), 7.91 (d, *J* = 8.5 Hz, 3H), 7.61 – 7.51 (m, 2H), 7.43 (dd, *J* = 17.2, 7.8 Hz, 4H), 7.18 (s, 1H), 4.65 – 4.52 (m, 1H), 3.71 – 3.51 (m, 4H), 2.59 (s, 3H), 2.47 (s, 3H). 13C NMR (100 MHz, CDCl3) δ 198.1, 197.0, 196.9, 150.0, 149.9, 147.2, 147.2, 140.5, 140.4, 139.8, 139.8, 136.6, 134.9, 134.9, 133.9, 133.4, 132.9, 132.7, 130.0, 130.0, 129.5, 129.5, 129.0, 129.0, 128.7, 128.1, 125.3, 124.7, 124.6, 42.6, 42.6, 34.4, 21.8, 18.6ppm. HRMS [EI+] calcd for C28H23ClFNO2 m/z 459.1401 [M+], found 459.1400 [M+].

**3-(2-chloro-5,7-dimethylquinolin-3-yl)-1-(4-chlorophenyl)-5-phenylpentane-1,5-dione (3k):** White solid, Yield (80%), mp 130-133oC, IR (KBr, cm-1) 1672.72 (*4*-ClC6H4-C=O), 1629.78 (C6H5-C=O). 1H NMR (400 MHz, CDCl3) δ 8.23 (s, 1H), 8.06 – 7.94 (m, 4H), 7.56 (dd, *J* = 10.5, 9.0 Hz, 2H), 7.45 (t, *J* = 7.5 Hz, 2H), 7.18 (s, 1H), 7.12 (t, *J* = 8.5 Hz, 2H), 4.59 (dq, *J* = 13.2, 6.7 Hz, 1H), 3.71 – 3.51 (m, 4H), 2.59 (s, 3H), 2.48 (s, 3H). 13C NMR (100 MHz, CDCl3) δ 198.2, 198.2, 196.6, 196.6, 147.2, 140.5, 140.4, 136.6, 133.9, 133.4, 133.3, 133.0, 132.9, 132.8, 130.8, 130.7, 130.0, 130.0, 128.7, 128.7, 128.13125.3, 124.7, 115.9, 115.9, 115.7, 115.7, 42.7, 42.6, 42.5, 34.5, 21.8, 18.6 ppm. HRMS [EI+] calcd for C28H23Cl2NO2 m/z 475.1106 [M+], found .475.1100 [M+].

**3-(2-chloro-6,8-dimethylquinolin-3-yl)-1-(4-fluorophenyl)-5-phenylpentane-1,5-dione (3l)**: White solid, Yield (85%), mp 308-310oC, IR (KBr, cm-1) 1676.22 (*4*-FC6H4-C=O), 1628.78 (C6H5-C=O). 1H NMR (400 MHz, CDCl3) δ 8.06 (s, 1H) 8-01- 7.94 (m, 5H), 7.56 (dd, *J* = 7.8, 5.8 Hz, 1H), 7.45 (t, *J* = 7.0 Hz, 2H), 7.36 (s, 2H), 7.12 (t, *J* = 7.9 Hz, 2H), 4.58 (dt, *J* = 13.4, 6.8 Hz, 1H), 3.71 – 3.50 (m, 4H), 2.70 (s, 3H), 2.45 (s, 3H). 13C NMR (101 MHz, CDCl3) δ 198.0, 196.4, 136.6, 135.8, 133.3, 133.0, 132.5, 130.8, 130.7, 128.7, 128.1, 127.4, 124.1, 115.9, 115.7, 42.5, 34.0, 21.5, 17.6 ppm. HRMS [EI+] calcd for C28H23ClFNO2 m/z 459.1401 [M+], found 459.1400 [M+].

**3. Spectral images of the synthesized derivatives of 3a-l**

**(3a): 1-(4-chlorophenyl)-3-(2-chloroquinolin-3-yl)-5-phenylpentane-1,5-dione**


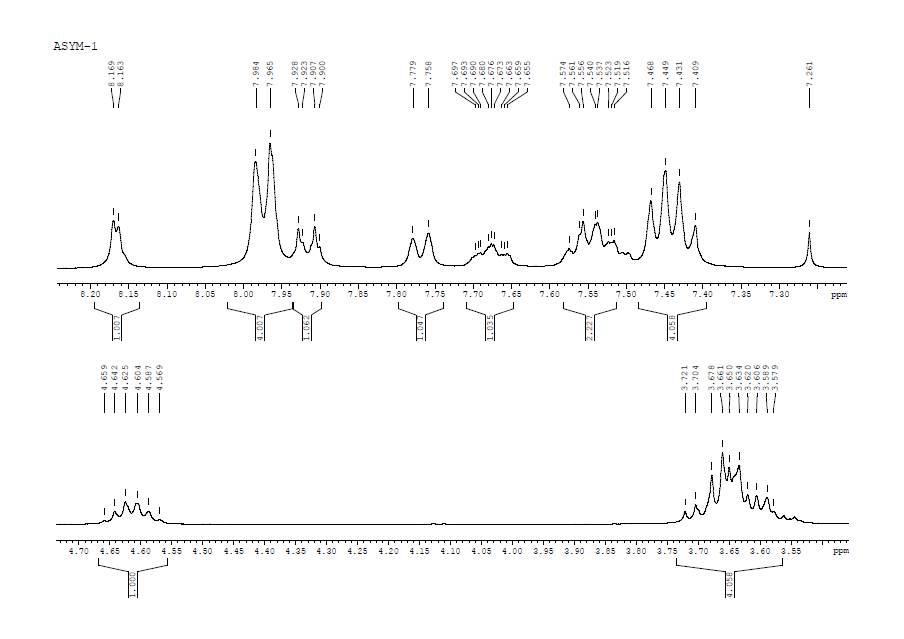


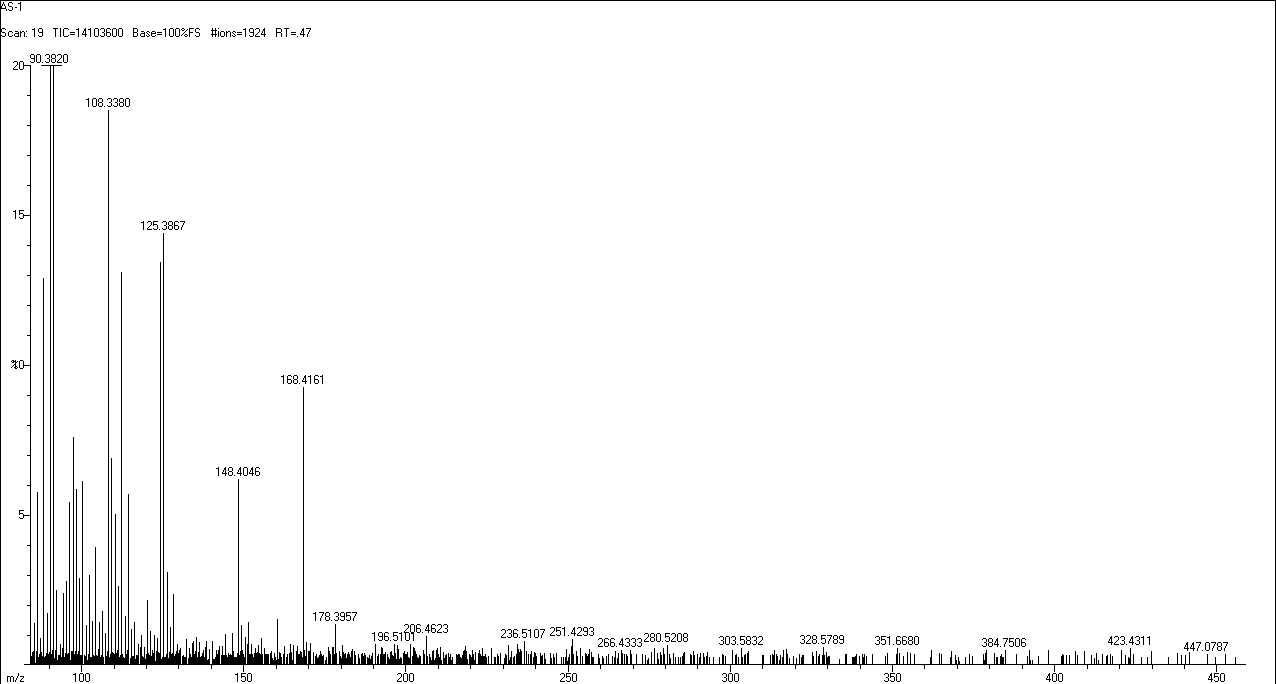


**(3b): 3-(2-chloroquinolin-3-yl)-1-(4-fluorophenyl)-5-phenylpentane-1,5-dione**


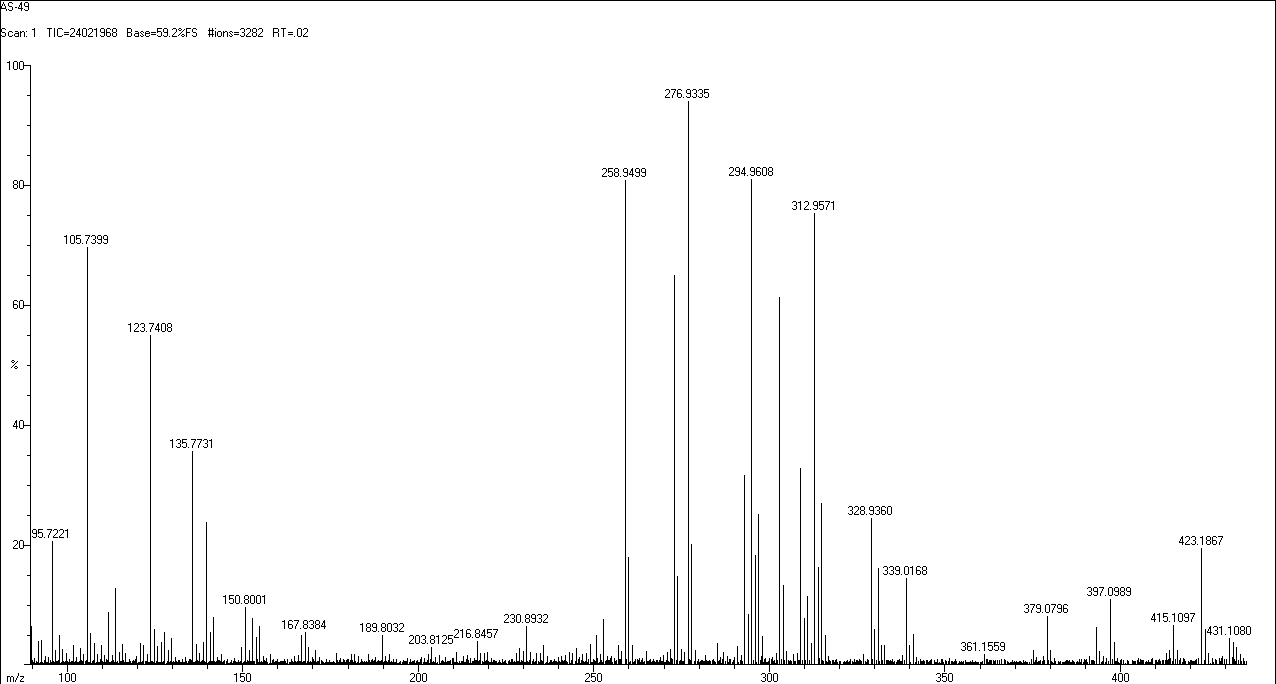


**(3c): 1-(4-chlorophenyl)-3-(2-chloroquinolin-3-yl)-5-(4-fluorophenyl)pentane-1,5-dione**


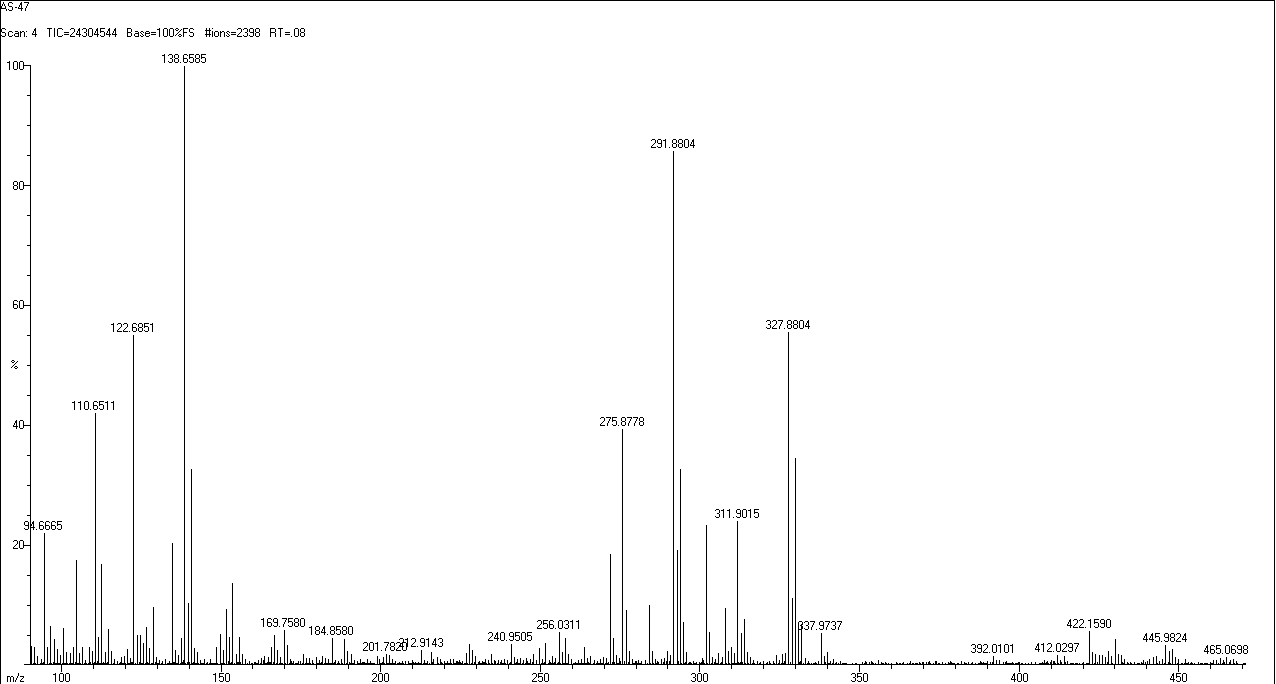


**(3d): 3-(2-chloro-7-methylquinolin-3-yl)-1-(4-methoxyphenyl)-5-phenylpentane-1,5-dione**

**(3e): 3-(2-chloro-7-methylquinolin-3-yl)-1-(4-fluorophenyl)-5-phenylpentane-1,5-dione**


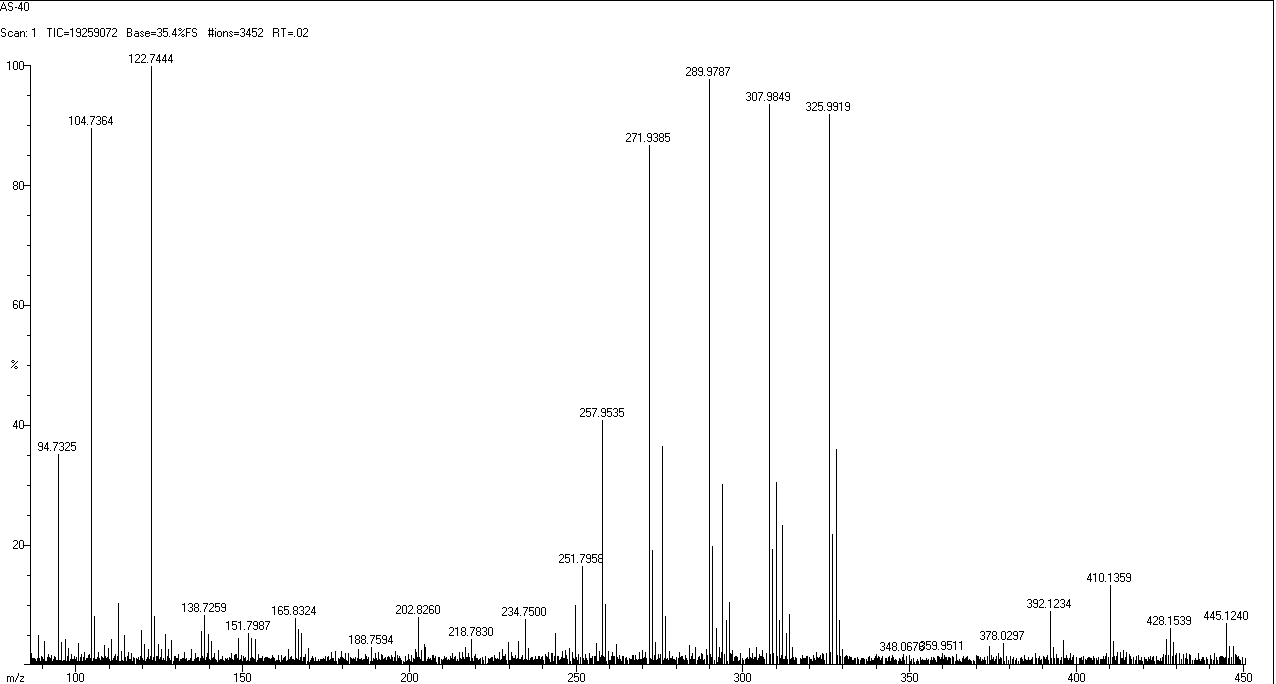


**(3f): 3-(2-chloro-6-methylquinolin-3-yl)-1-(4-fluorophenyl)-5-phenylpentane-1,5-dione**

**(3g): 3-(2-chloro-6-methylquinolin-3-yl)-1-(4-chlorophenyl)-5-(4-fluorophenyl)pentane-1,5-dione**


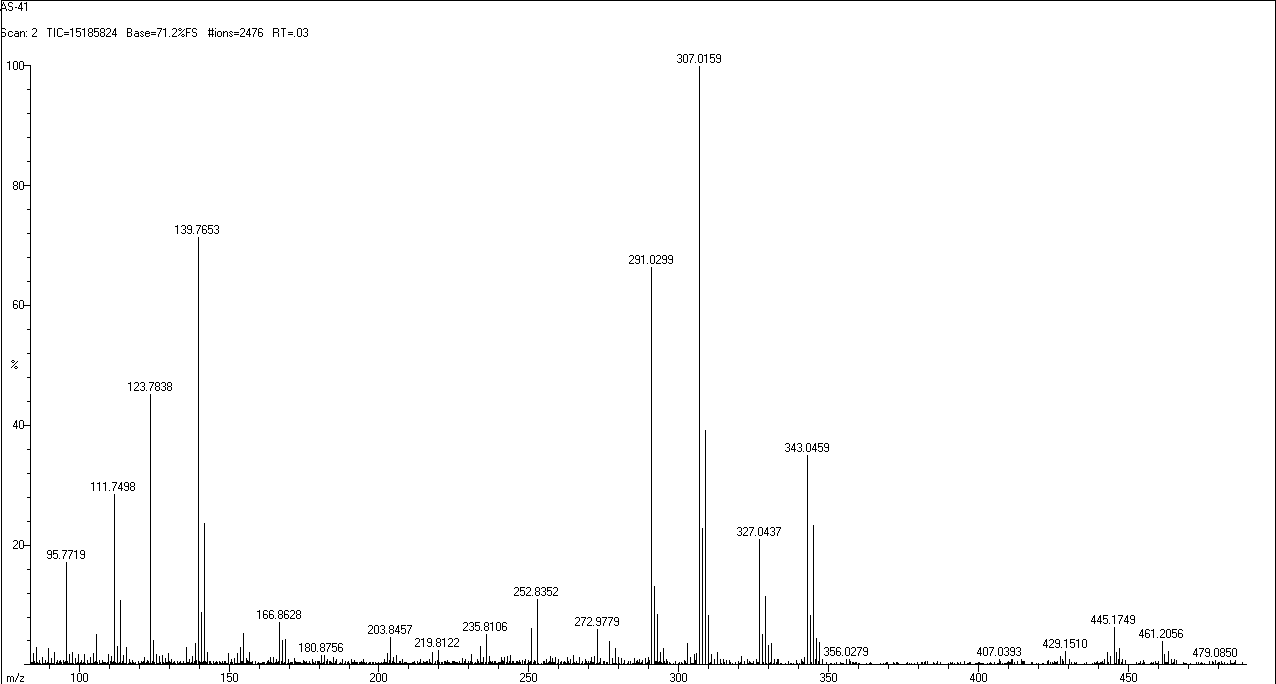


**(3h): 3-(2-chloro-6-methylquinolin-3-yl)-1-(4-fluorophenyl)-5-(4-methoxyphenyl)pentane-1,5-dione**


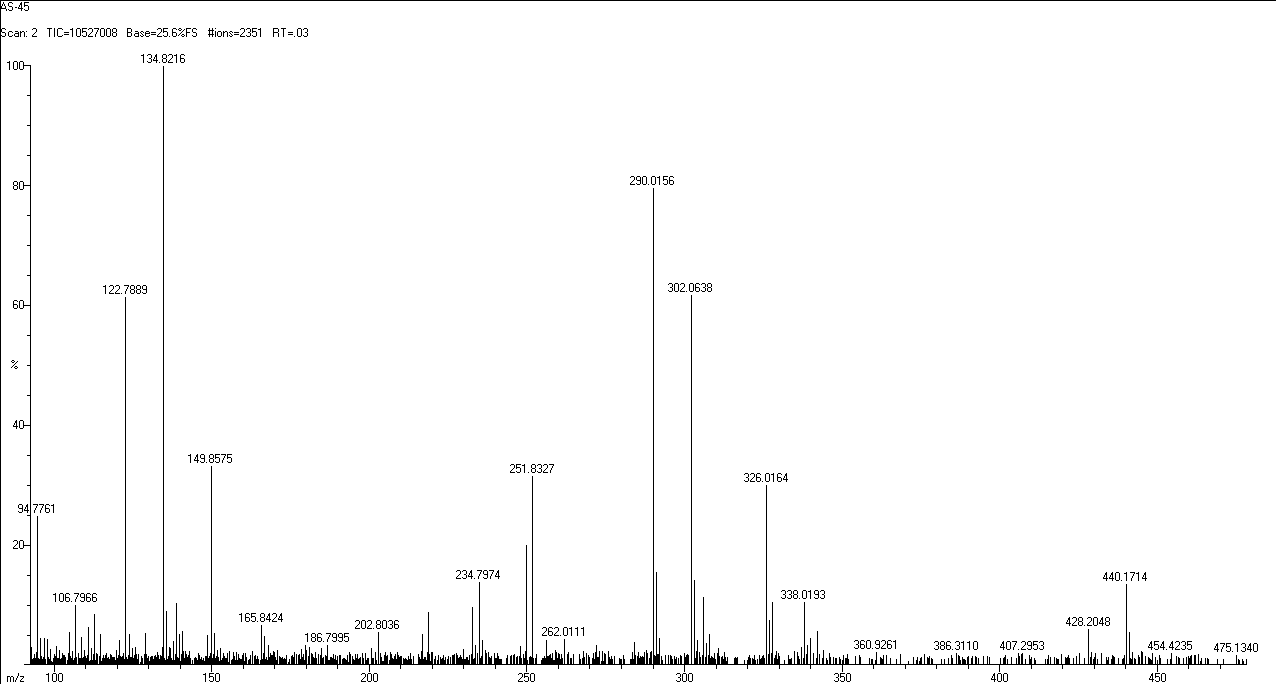


**(3i): 3-(2-chloro-6-methylquinolin-3-yl)-1-(4-methoxyphenyl)-5-phenylpentane-1,5-dione**


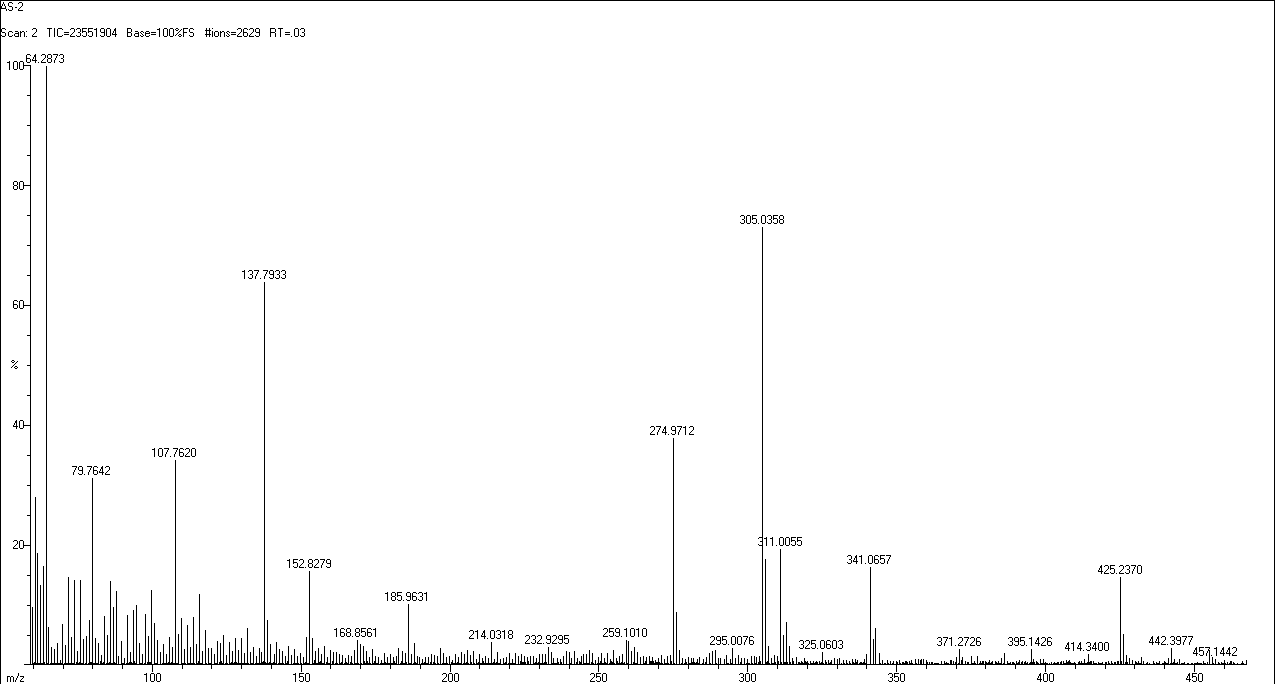


**(3j): 3-(2-chloro-5,7-dimethylquinolin-3-yl)-1-(4-fluorophenyl)-5-phenylpentane-1,5-dione**

**
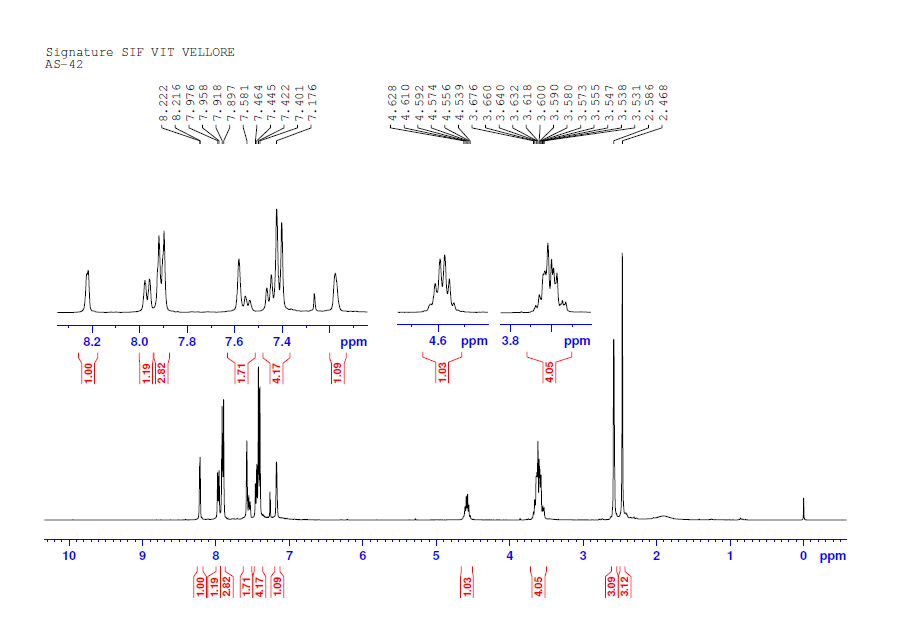
**


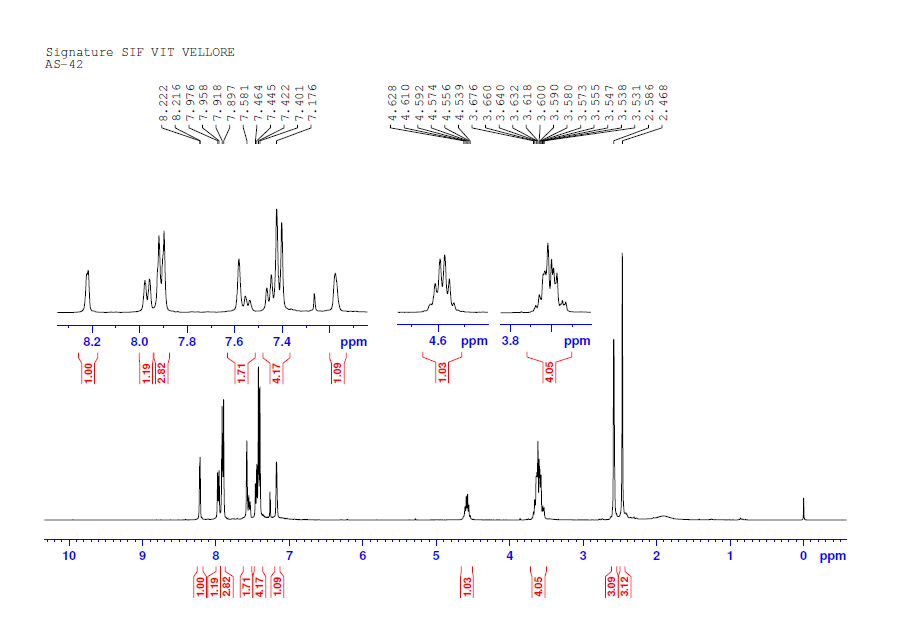


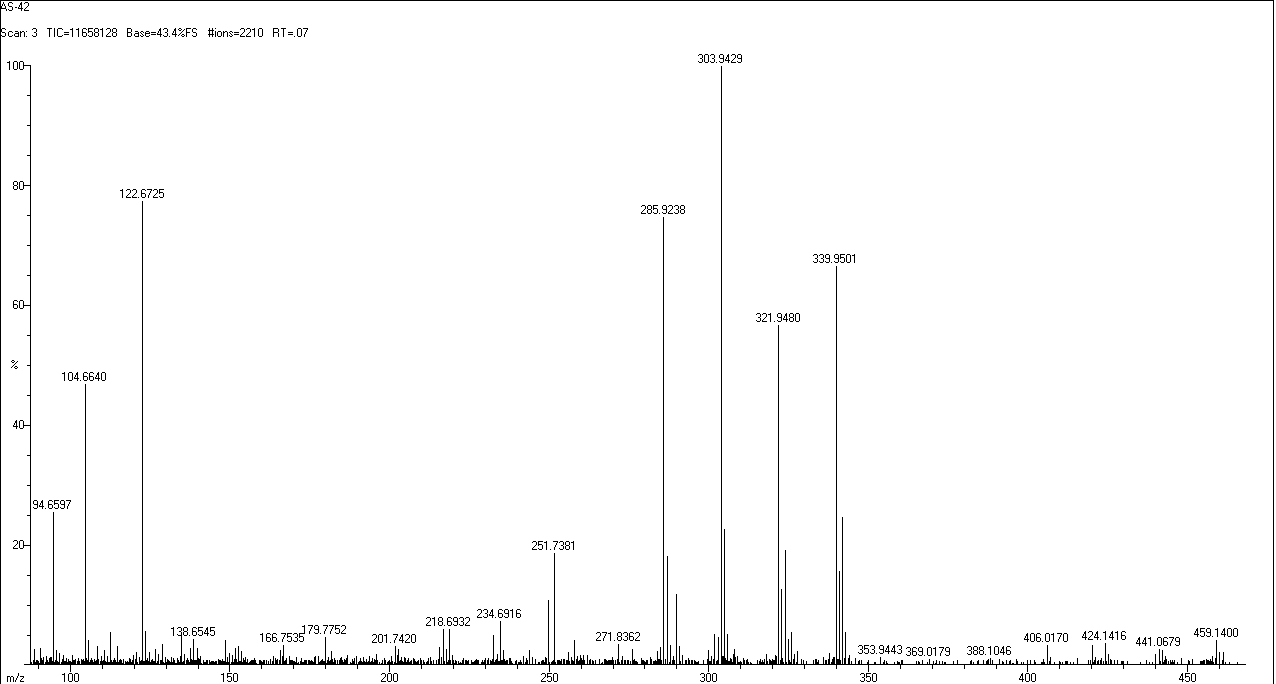


**(3k): 3-(2-chloro-5,7-dimethylquinolin-3-yl)-1-(4-chlorophenyl)-5-phenylpentane-1,5-dione**


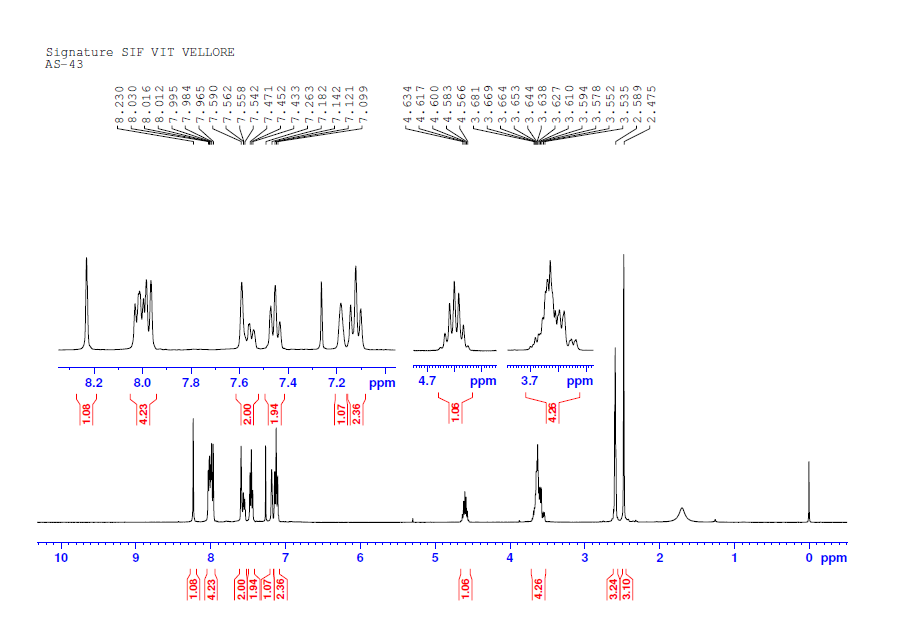


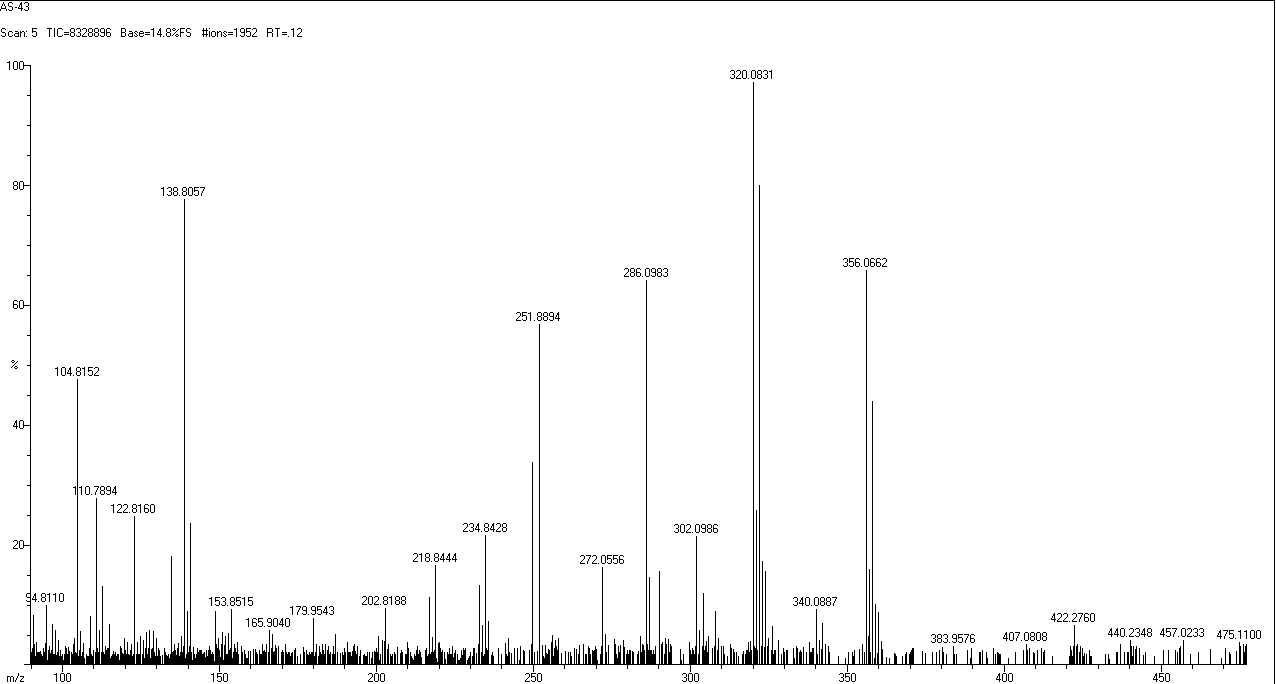


**(3l): 3-(2-chloro-6,8-dimethylquinolin-3-yl)-1-(4-fluorophenyl)-5-phenylpentane-1,5-dione**
